# Supplementary material for: Characterization of Exterior Parts for 3D-Printed Humanoid Robot Arm with Various Patterns and Thicknesses
Source: MDPI journal article supplement (doi:10.3390/polym16070988), 2024-04-04
Supplement: s1 [file s1]

## Supplementary

### < List of Tables >

**Table S1.** Sample code and slicing of 3D printed forearm of solid pattern with three different thickness

**Table S2.** Sample code and slicing of 3D printed forearm of re-entrant pattern with three different thickness

**Table S3.** Sample code and slicing of 3D printed forearm of solid pattern with three different thickness

**Table S4.** Sample code and slicing of 3D printed forearm of re-entrant pattern with three different thickness

**Table S5.** Sample code and slicing of 3D printed upperarm of solid pattern with three different thickness

**Table S6.** Sample code and slicing of 3D printed upperarm of re-entrant pattern with three different thickness

**Table S7.** Sample code and slicing of 3D printed upperarm of solid pattern with three different thickness

**Table S8.** Sample code and slicing of 3D printed upperarm of re-entrant pattern with three different thickness

**Table S1.** Sample code and slicing of 3D printed forearm of solid pattern with three different thickness

| Sample code | Slicing                                                                              |
|-------------|--------------------------------------------------------------------------------------|
|             | Top                                                                                  |
| FA_SL1      | 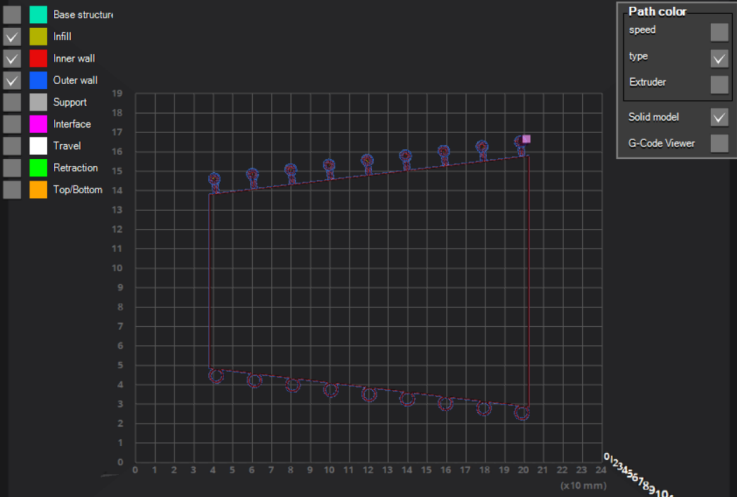   |
| FA_SL2      |   |
| FA_SL4      |  |

**Table S2.** Sample code and slicing of 3D printed forearm of re-entrant pattern with three different thickness

| Sample code | Slicing                                                                              |
|-------------|--------------------------------------------------------------------------------------|
|             | Top                                                                                  |
| FA_RE1      | 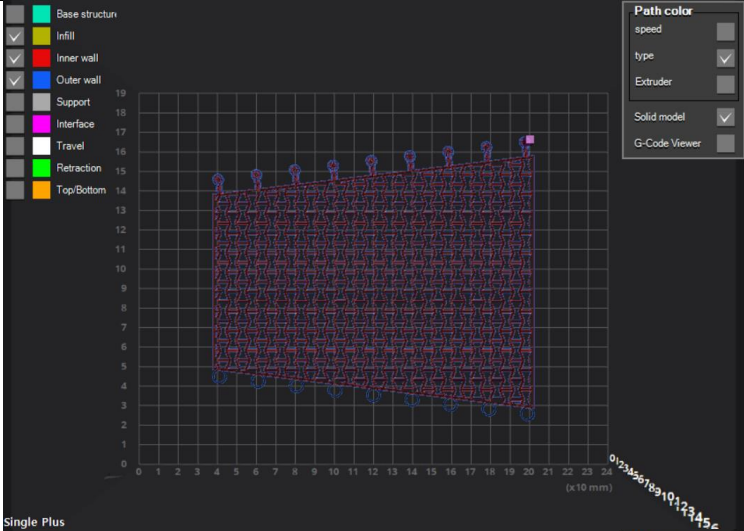   |
| FA_RE2      |   |
| FA_RE4      |  |

**Table S3.** Sample code and slicing of 3D printed forearm of solid pattern with three different thickness

| Sample code | Slicing                                                                              |  |
|-------------|--------------------------------------------------------------------------------------|--|
|             | Front                                                                                |  |
| FA_SL1      | 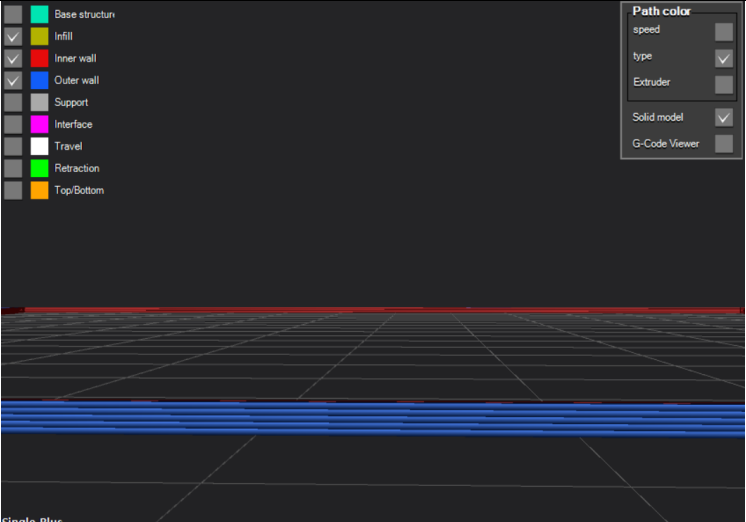   |  |
| FA_SL2      |   |  |
| FA_SL4      |  |  |

**Table S4.** Sample code and slicing of 3D printed forearm of re-entrant pattern with three different thickness

| Sample code | Slicing                                                                              |  |
|-------------|--------------------------------------------------------------------------------------|--|
|             | Front                                                                                |  |
| FA_RE1      | 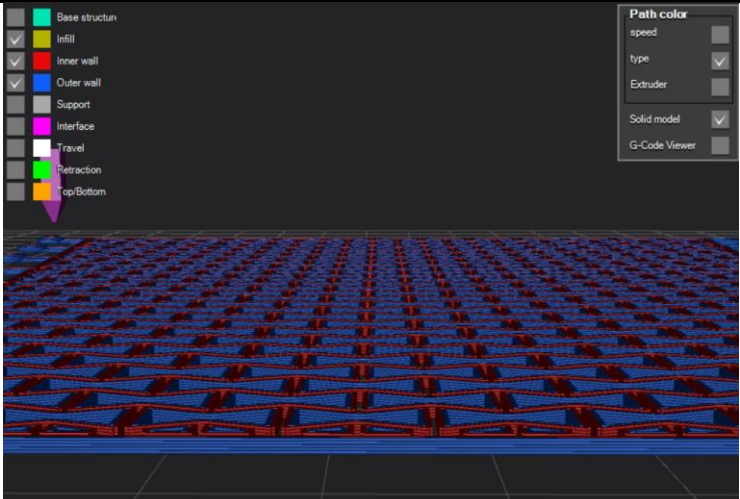   |  |
| FA_RE2      |   |  |
| FA_RE4      |  |  |

**Table S5.** Sample code and slicing of 3D printed upperarm of solid pattern with three different thickness

| Sample code | Slicing                                                                              |
|-------------|--------------------------------------------------------------------------------------|
|             | Top                                                                                  |
| UA_SL1      | 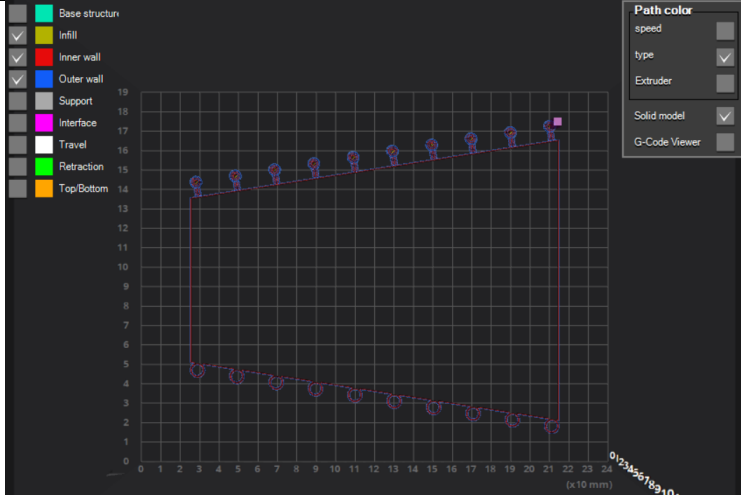   |
| UA_SL2      |   |
| UA_SL4      |  |



Table S6. Sample code and slicing of 3D printed upperarm of re-entrant pattern with three different thickness

| Sample code | Slicing                                                                              |  |
|-------------|--------------------------------------------------------------------------------------|--|
|             | Top                                                                                  |  |
| UA_RE1      | 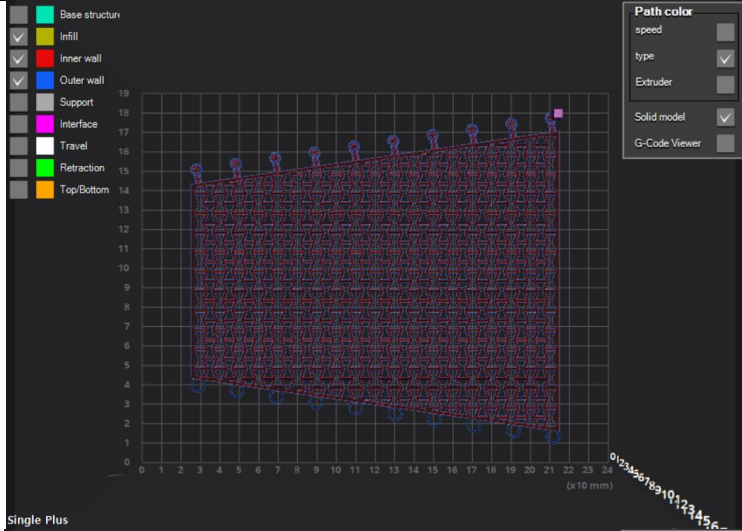   |  |
| UA_RE2      |   |  |
| UA_RE4      |  |  |

**Table S7.** Sample code and slicing of 3D printed upperarm of solid pattern with three different thickness

| Sample code | Slicing                                                                              |  |
|-------------|--------------------------------------------------------------------------------------|--|
|             | Front                                                                                |  |
| UA_SL1      | 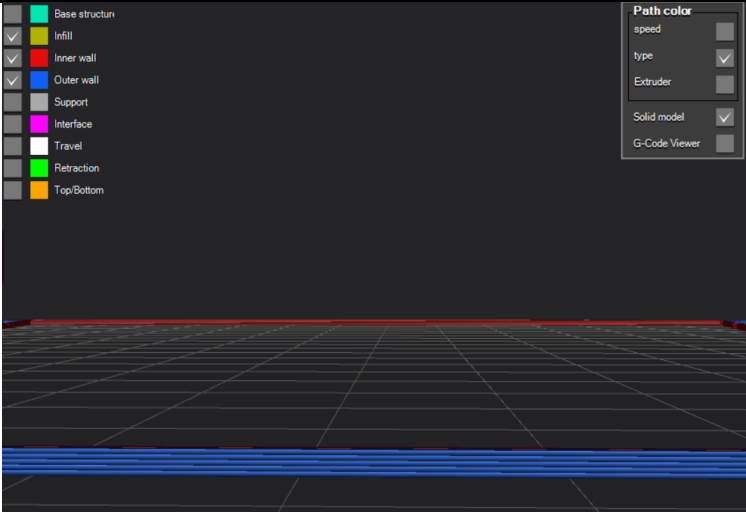   |  |
| UA_SL2      |   |  |
| UA_SL4      |  |  |



**Table S8.** Sample code and slicing of 3D printed upperarm of re-entrant pattern with three different thickness

| Sample code | Slicing                                                                              |  |
|-------------|--------------------------------------------------------------------------------------|--|
|             | Front                                                                                |  |
| UA_RE1      | 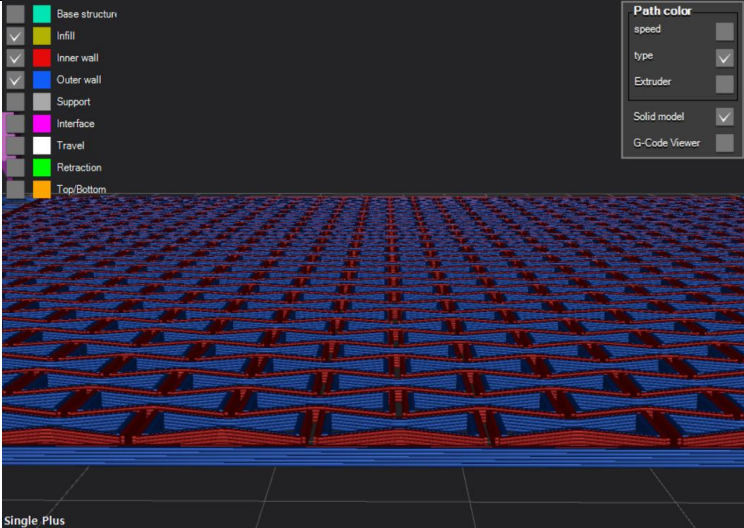   |  |
| UA_RE2      |   |  |
| UA_RE4      |  |  |
